# Supplementary material for: Adaptive robot training for the treatment of incoordination in Multiple Sclerosis
Source: Springer Nature journal article supplement (doi:10.1186/1743-0003-7-37), 2010-07-29

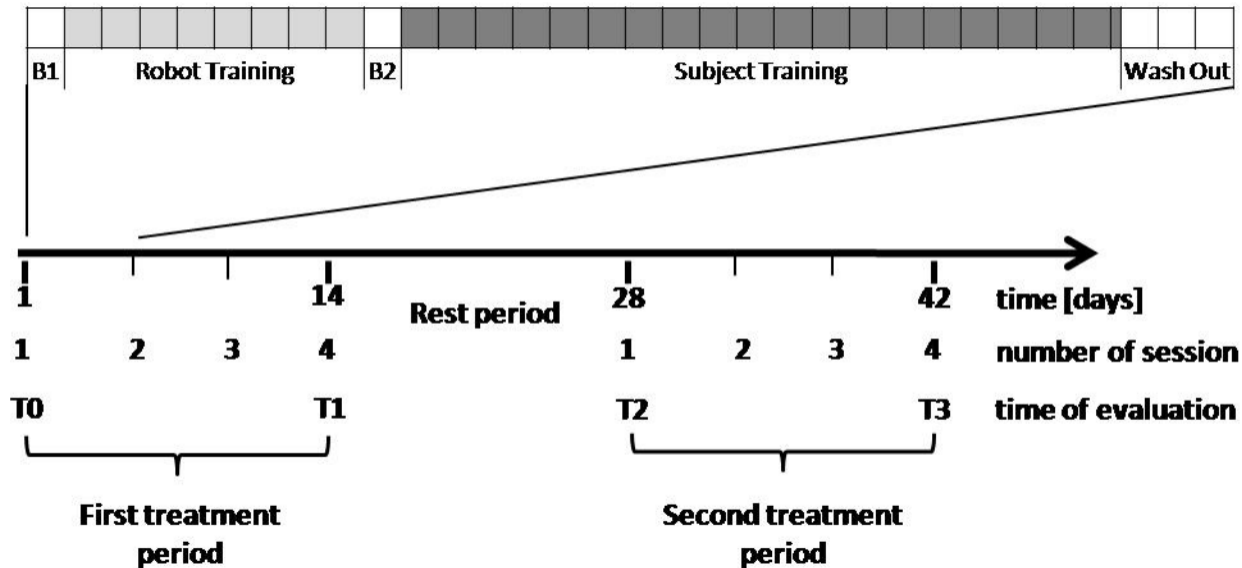

Supplement: 12984_2009_244_MOESM1_ESM.pdf [file 12984_2009_244_MOESM1_ESM.pdf]
